# Supplementary material
Source: PubMed Central journal article supplement (PMC1317918)

(A)

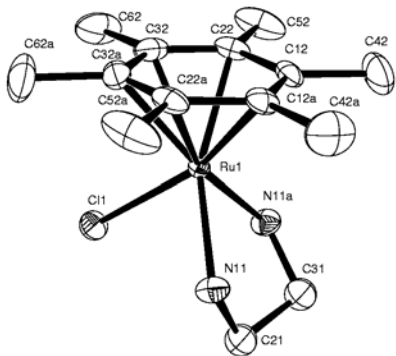

(B)

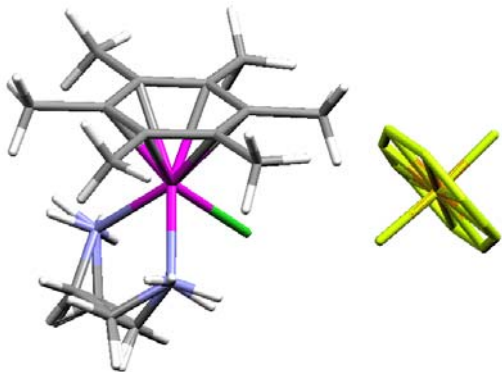

Supplement: pnas_0505798102_1.pdf [file pnas_0505798102_1.pdf]

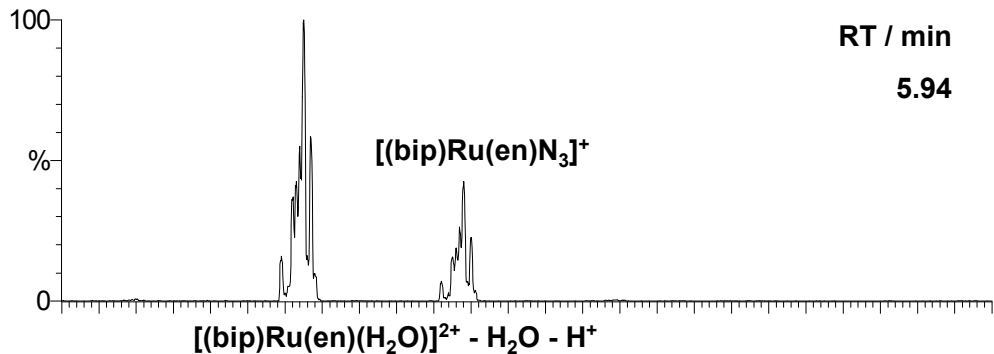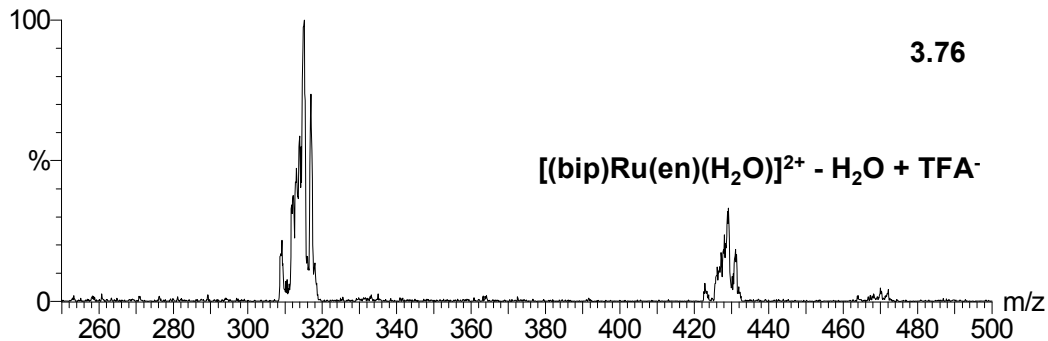

Supplement: pnas_0505798102_10.pdf [file pnas_0505798102_10.pdf]

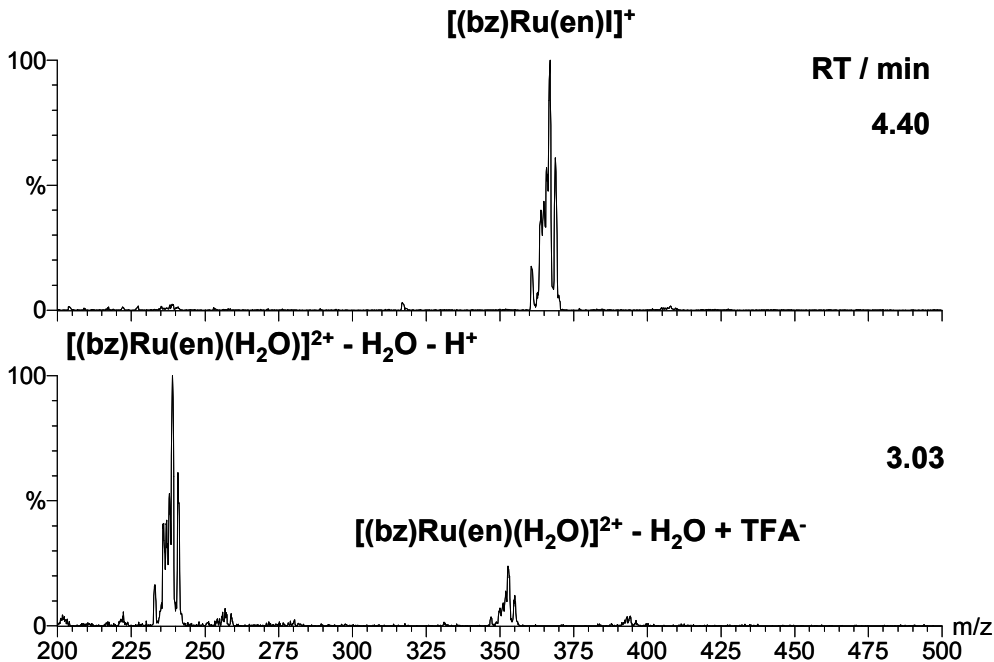

Supplement: pnas_0505798102_11.pdf [file pnas_0505798102_11.pdf]

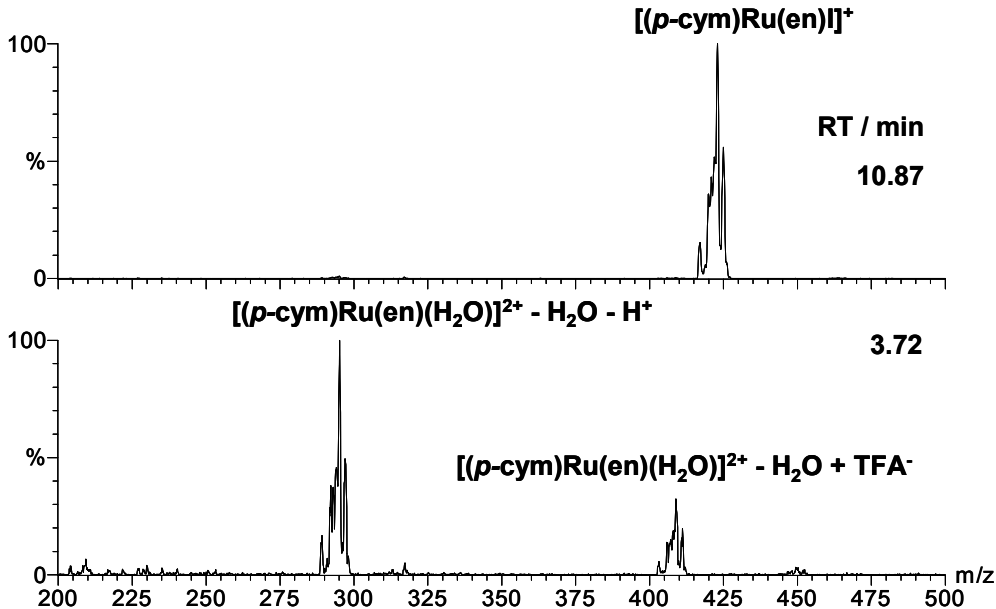

Supplement: pnas_0505798102_12.pdf [file pnas_0505798102_12.pdf]

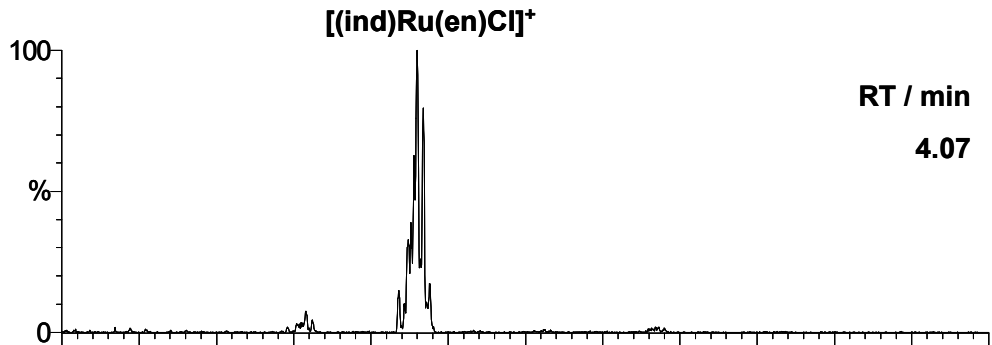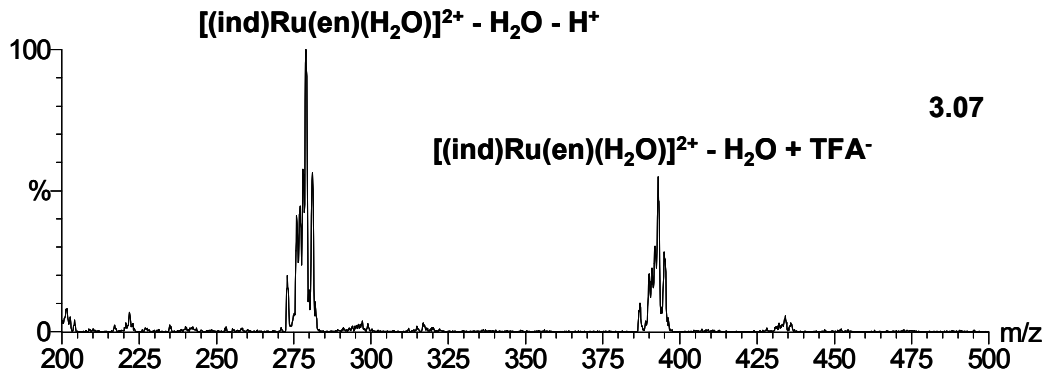

Supplement: pnas_0505798102_13.pdf [file pnas_0505798102_13.pdf]

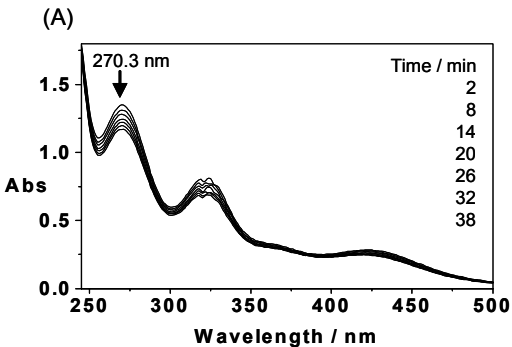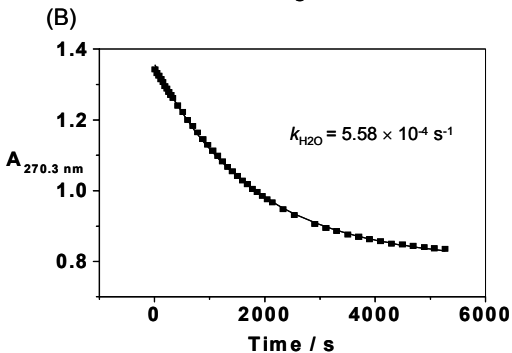

Supplement: pnas_0505798102_14.pdf [file pnas_0505798102_14.pdf]

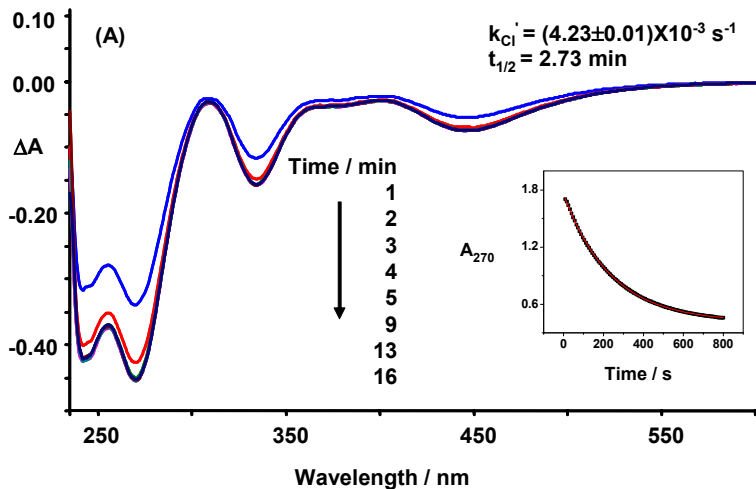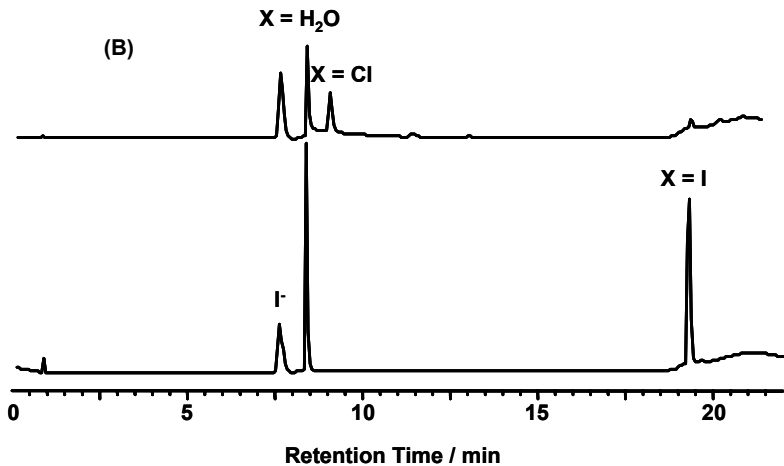

Supplement: pnas_0505798102_15.pdf [file pnas_0505798102_15.pdf]

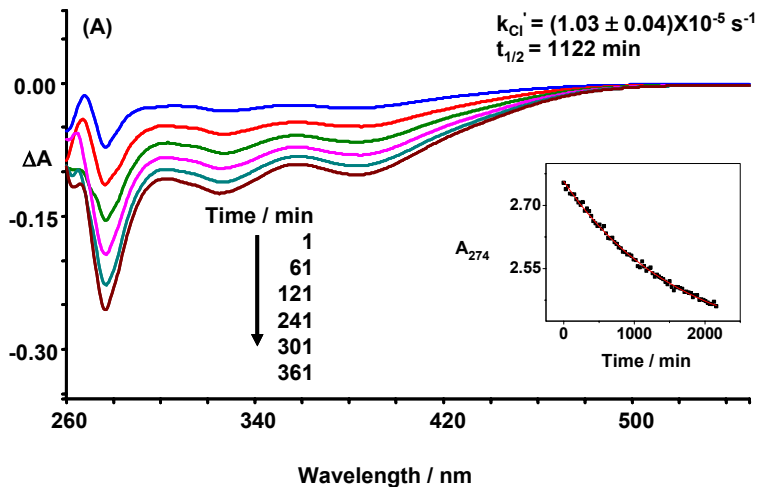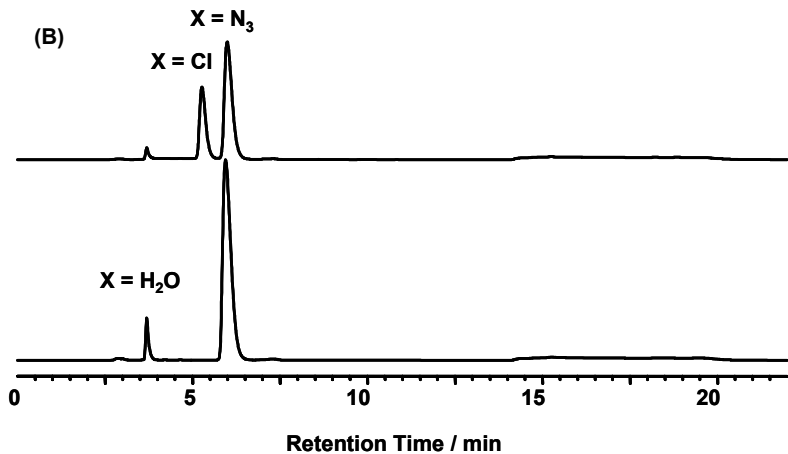

Supplement: pnas_0505798102_16.pdf [file pnas_0505798102_16.pdf]

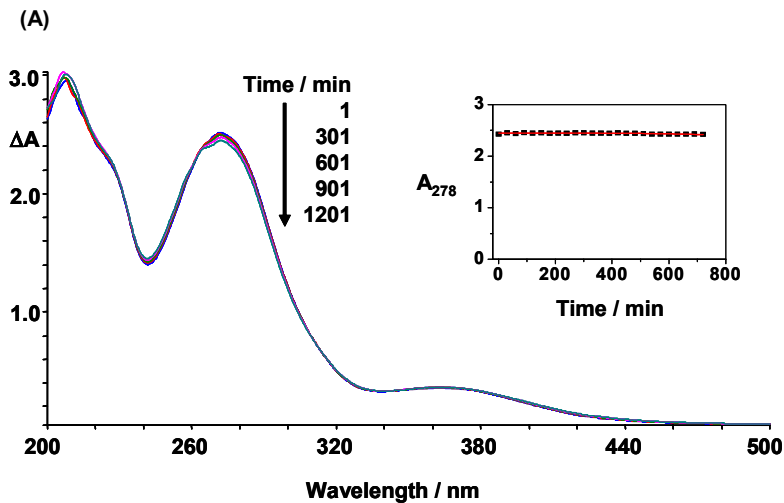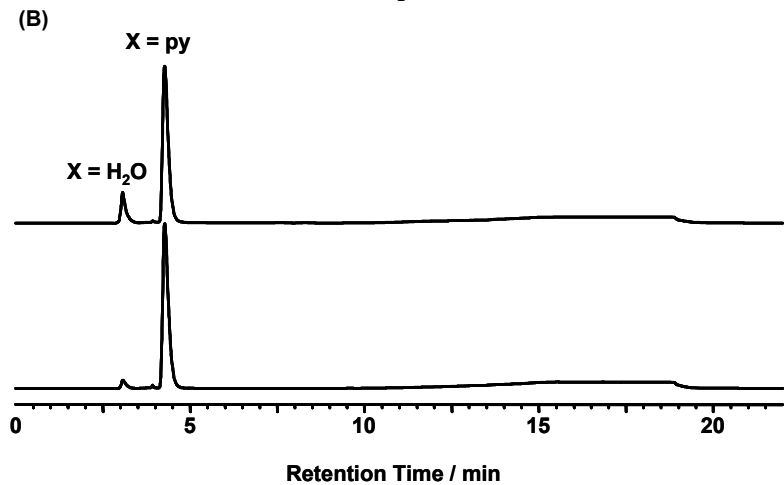

Supplement: pnas_0505798102_17.pdf [file pnas_0505798102_17.pdf]

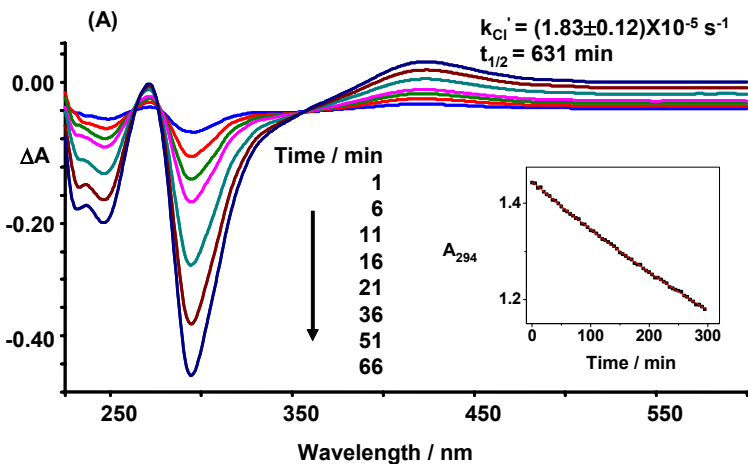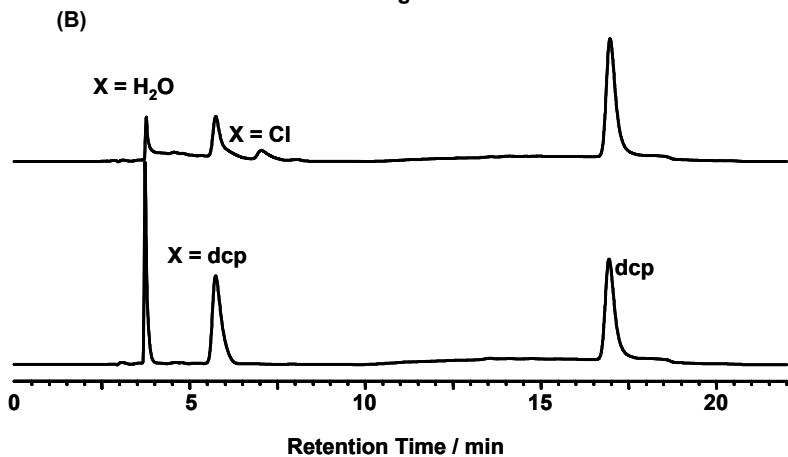

Supplement: pnas_0505798102_18.pdf [file pnas_0505798102_18.pdf]

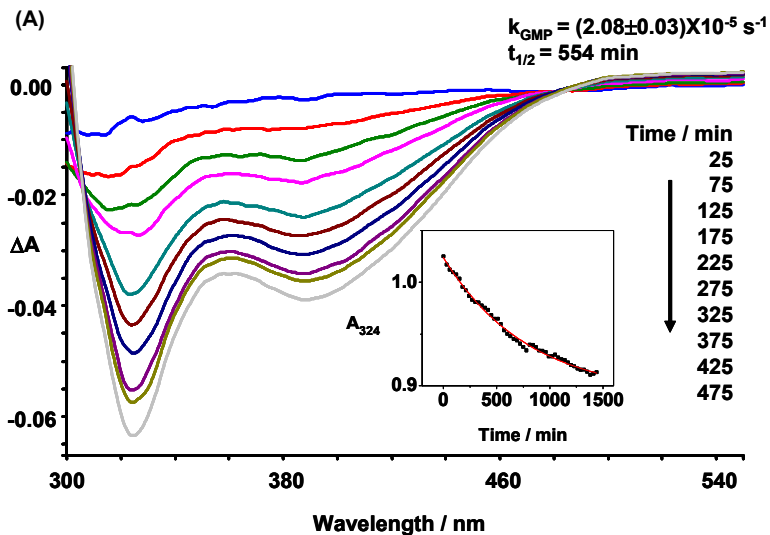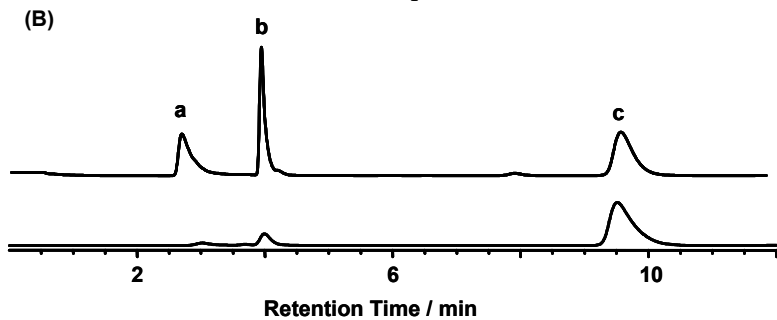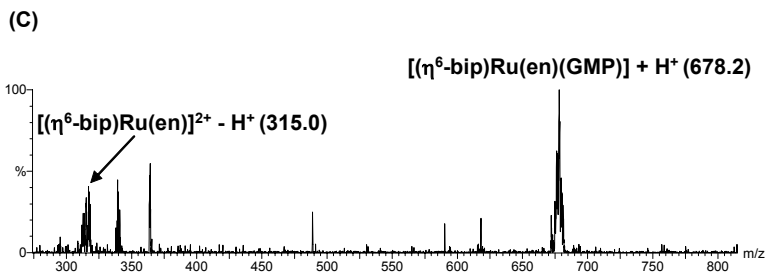

Supplement: pnas_0505798102_19.pdf [file pnas_0505798102_19.pdf]

(A)

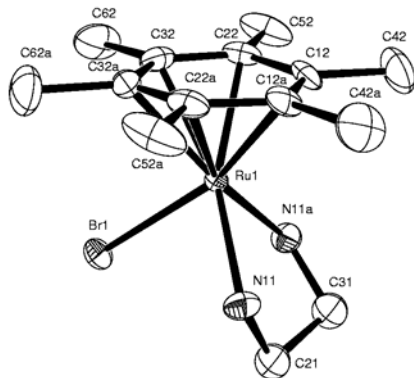

(B)

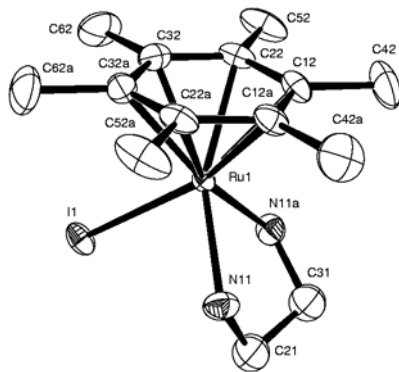

(C)

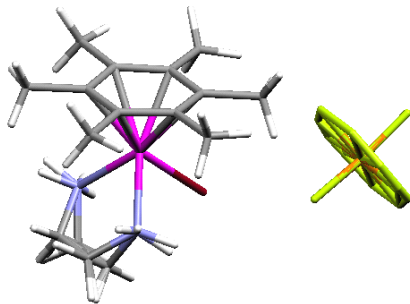

(D)

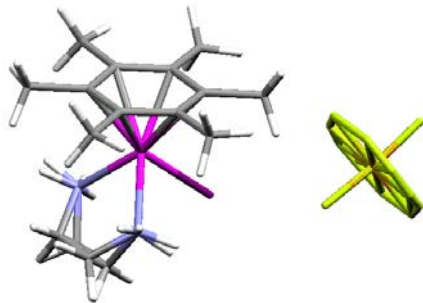

Supplement: pnas_0505798102_2.pdf [file pnas_0505798102_2.pdf]

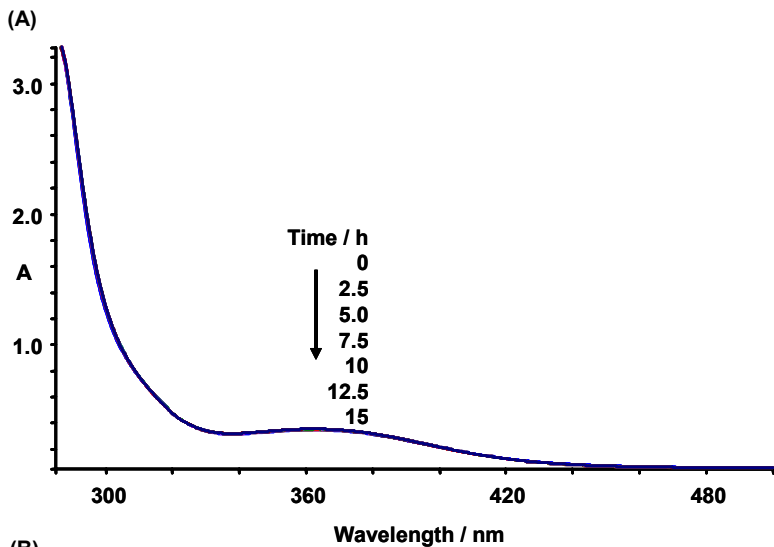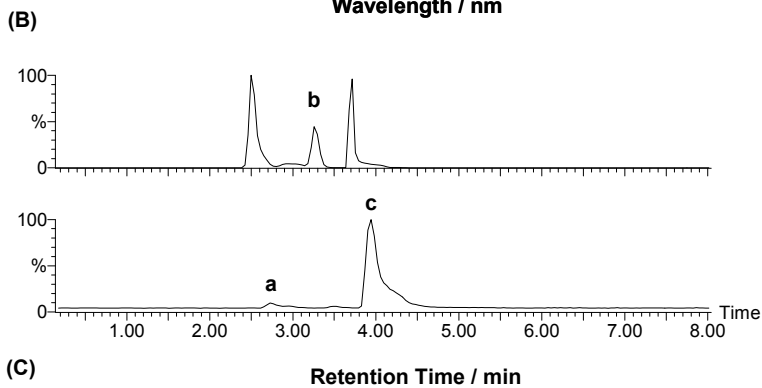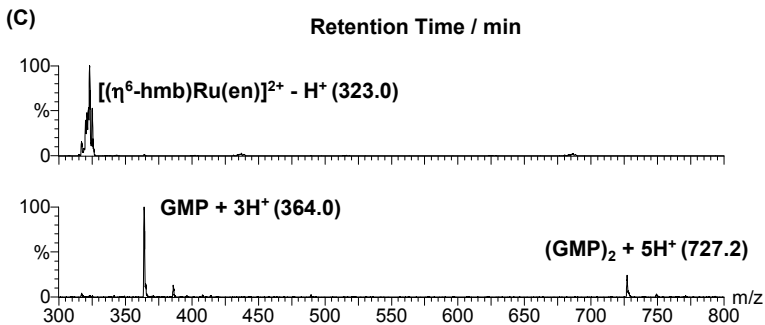

Supplement: pnas_0505798102_20.pdf [file pnas_0505798102_20.pdf]

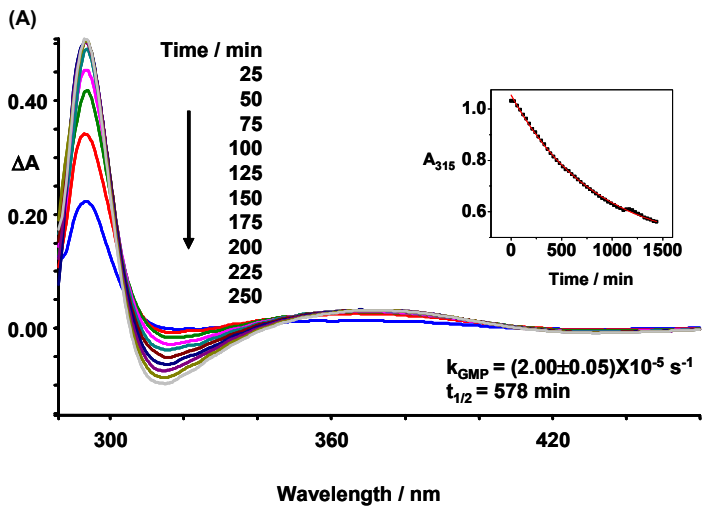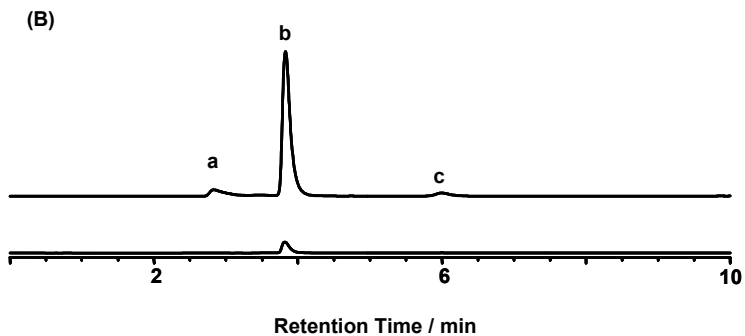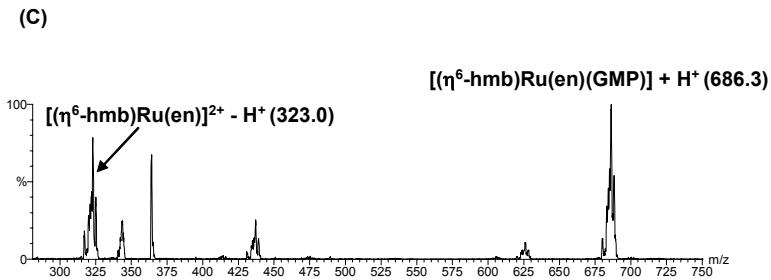

Supplement: pnas_0505798102_21.pdf [file pnas_0505798102_21.pdf]

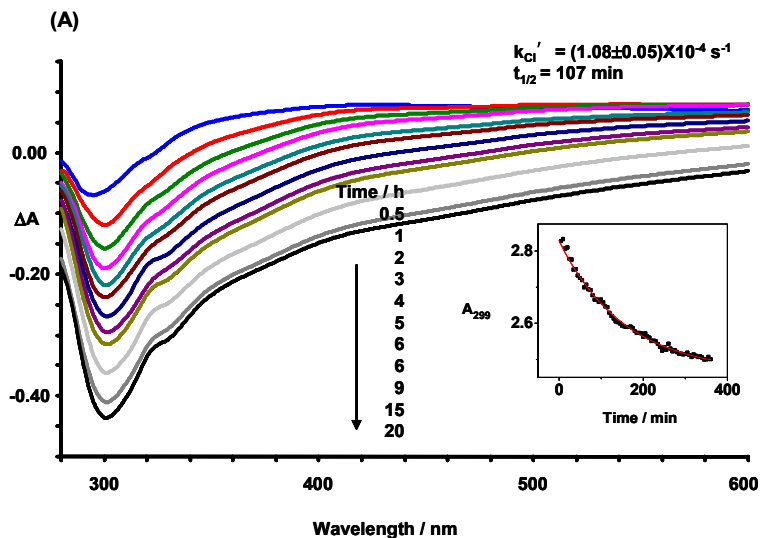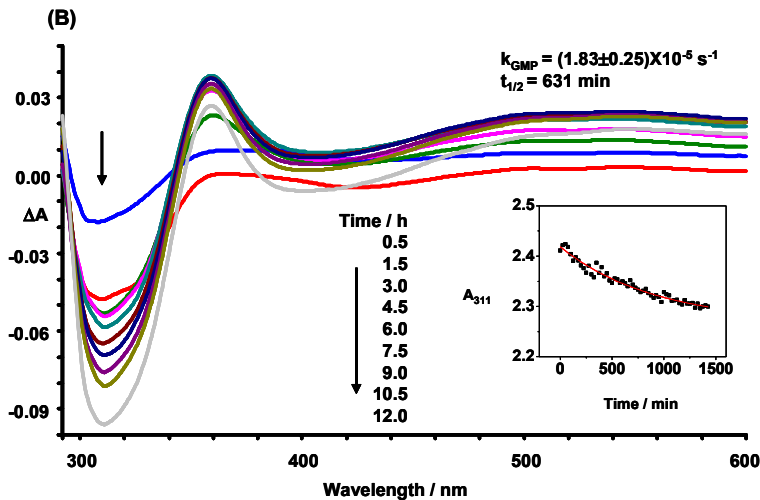

Supplement: pnas_0505798102_22.pdf [file pnas_0505798102_22.pdf]

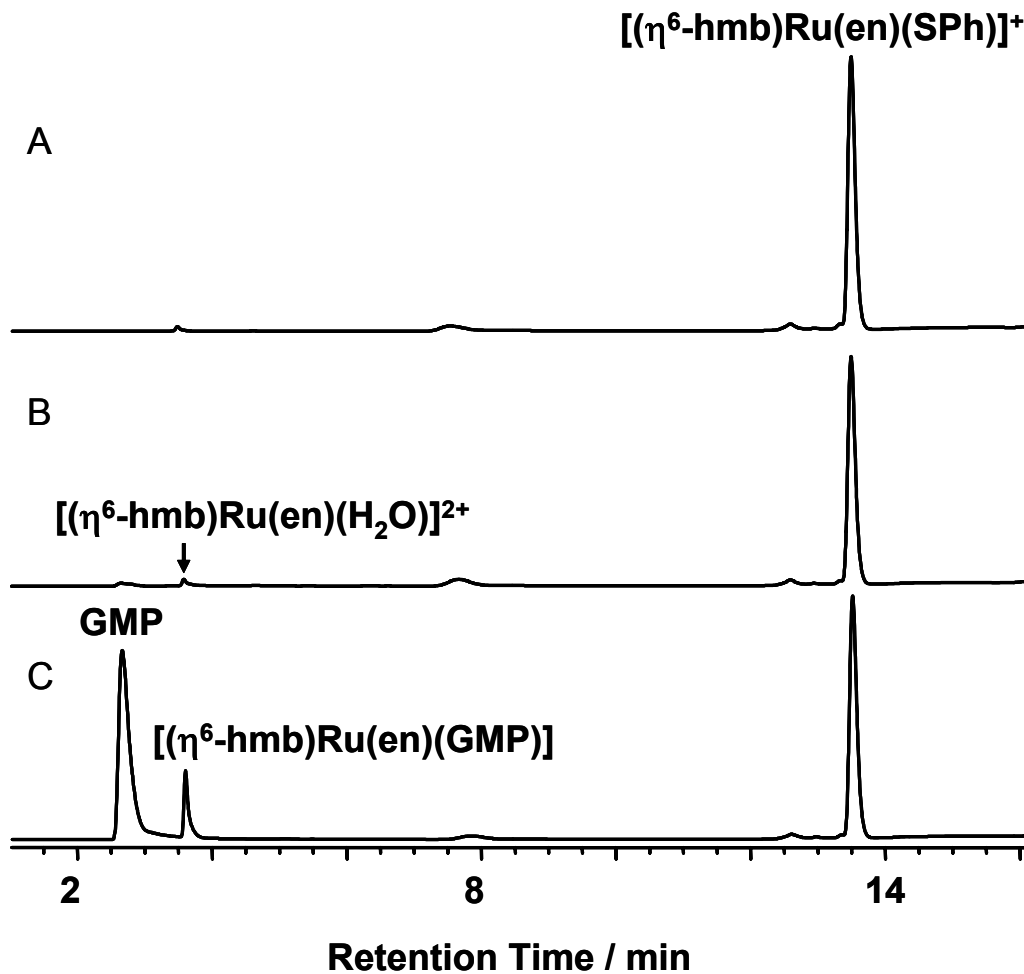

Supplement: pnas_0505798102_23.pdf [file pnas_0505798102_23.pdf]

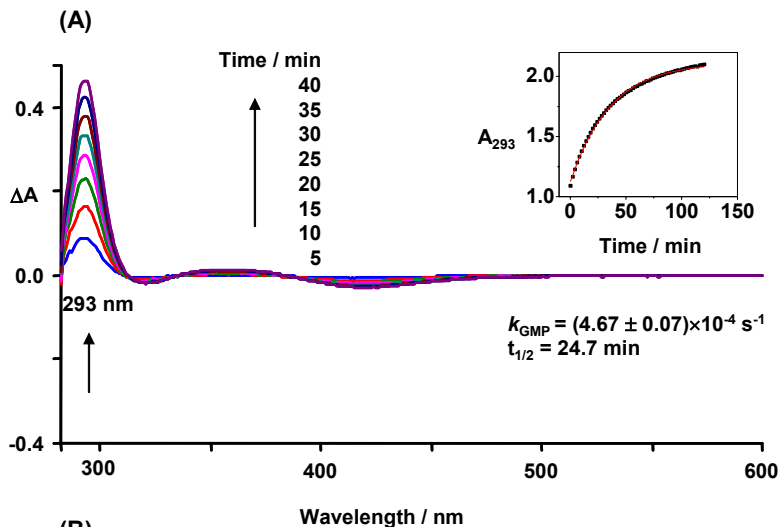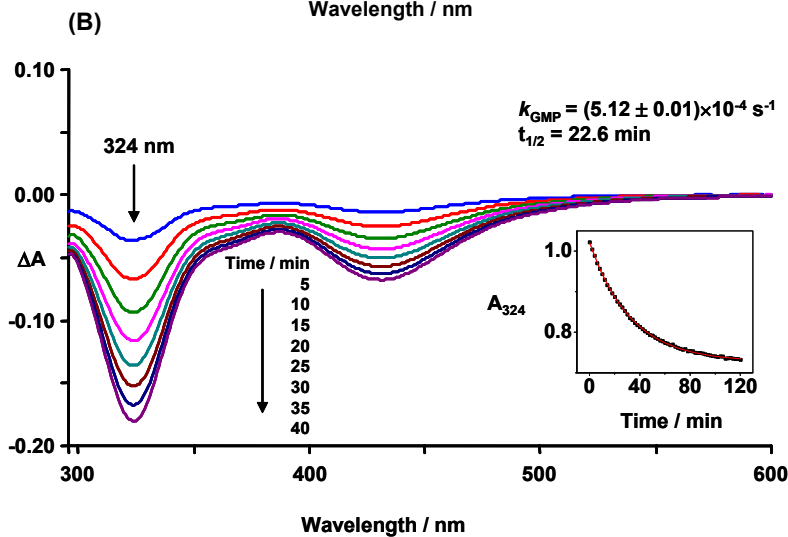

Supplement: pnas_0505798102_24.pdf [file pnas_0505798102_24.pdf]

**(A)**

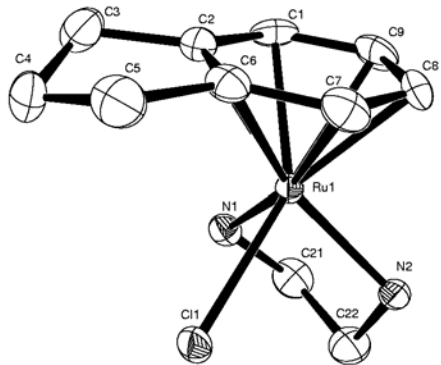

**(B)**

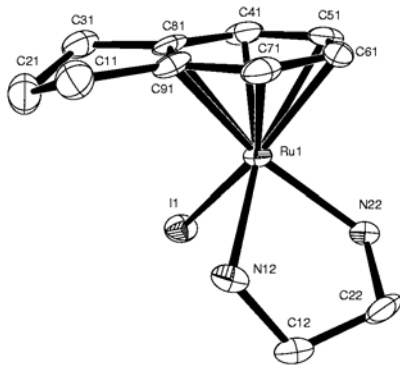

Supplement: pnas_0505798102_3.pdf [file pnas_0505798102_3.pdf]

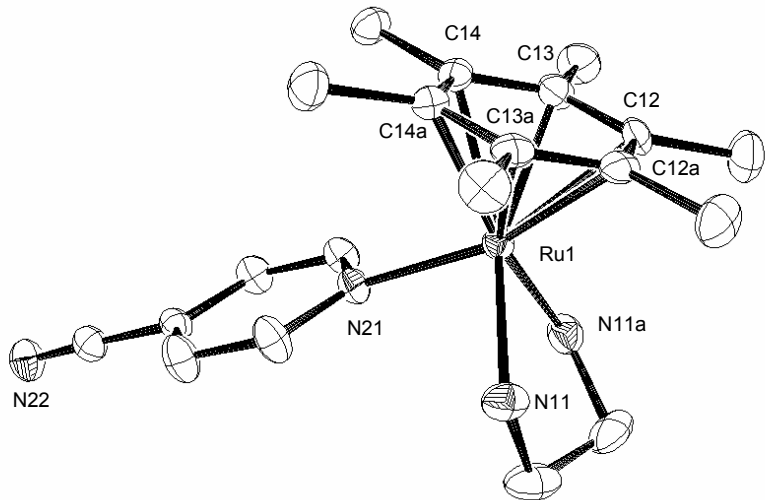

Supplement: pnas_0505798102_4.pdf [file pnas_0505798102_4.pdf]

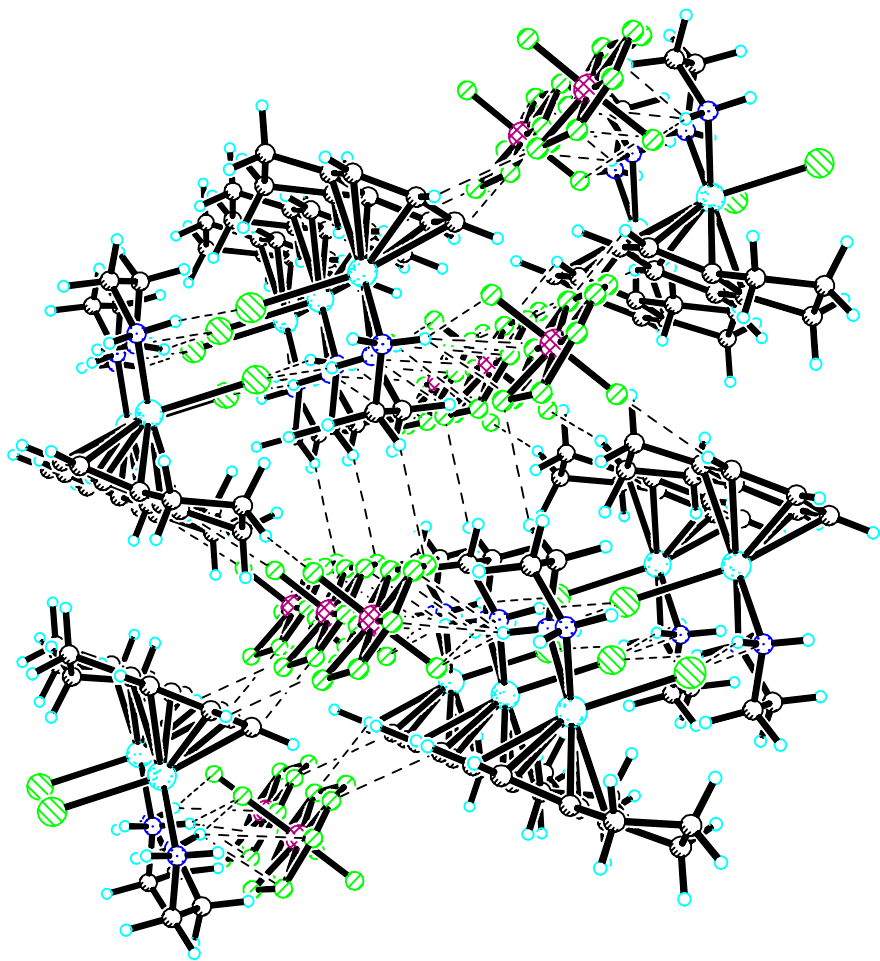

Supplement: pnas_0505798102_5.pdf [file pnas_0505798102_5.pdf]

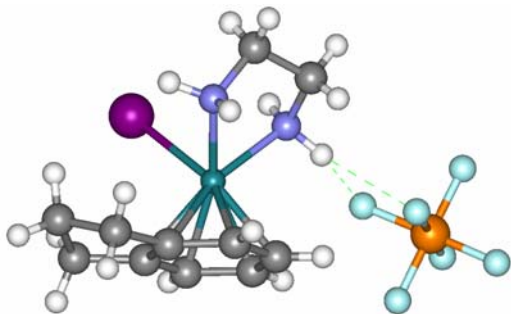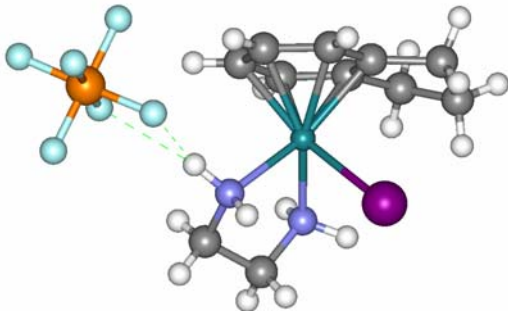

Supplement: pnas_0505798102_6.pdf [file pnas_0505798102_6.pdf]

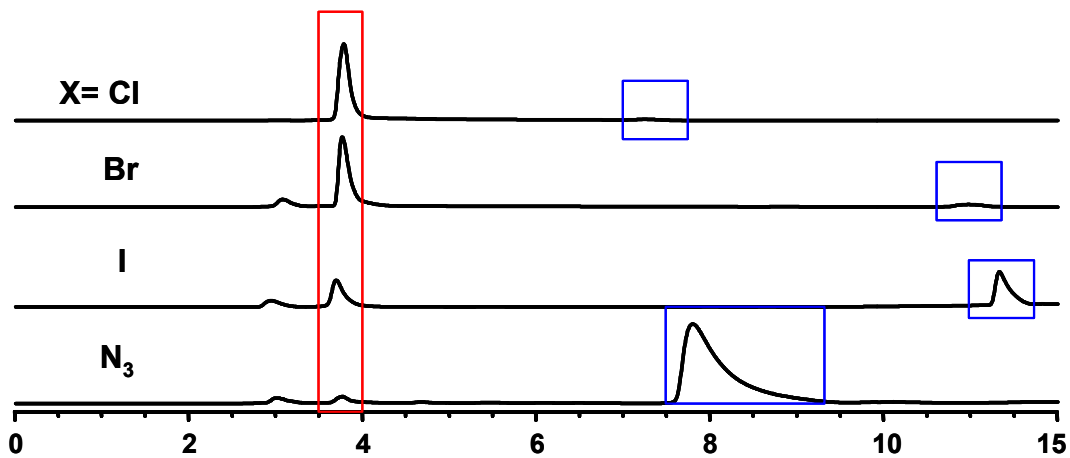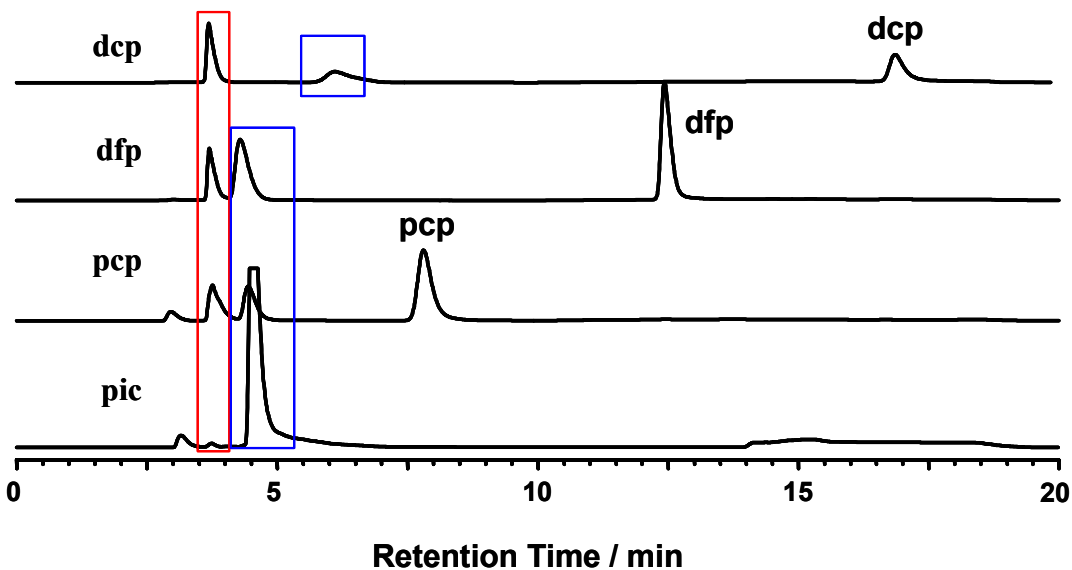

Aqua products     intact cations

Supplement: pnas_0505798102_7.pdf [file pnas_0505798102_7.pdf]

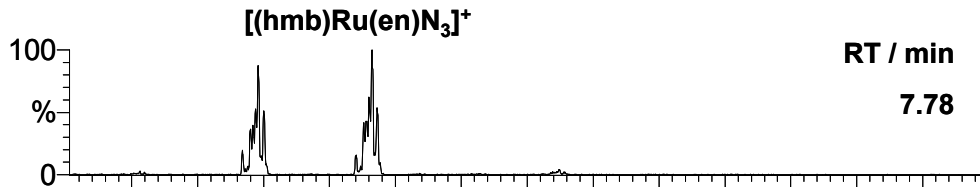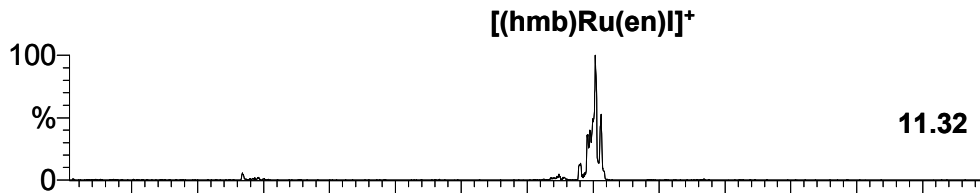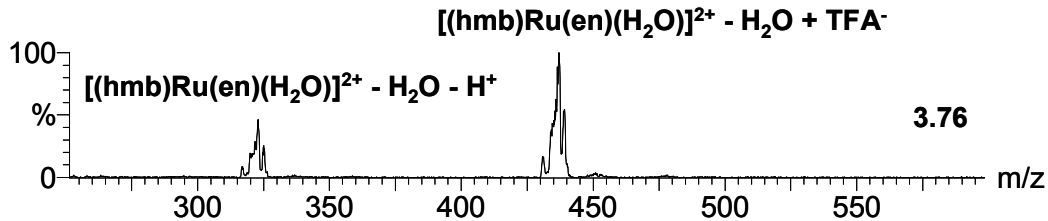

Supplement: pnas_0505798102_8.pdf [file pnas_0505798102_8.pdf]

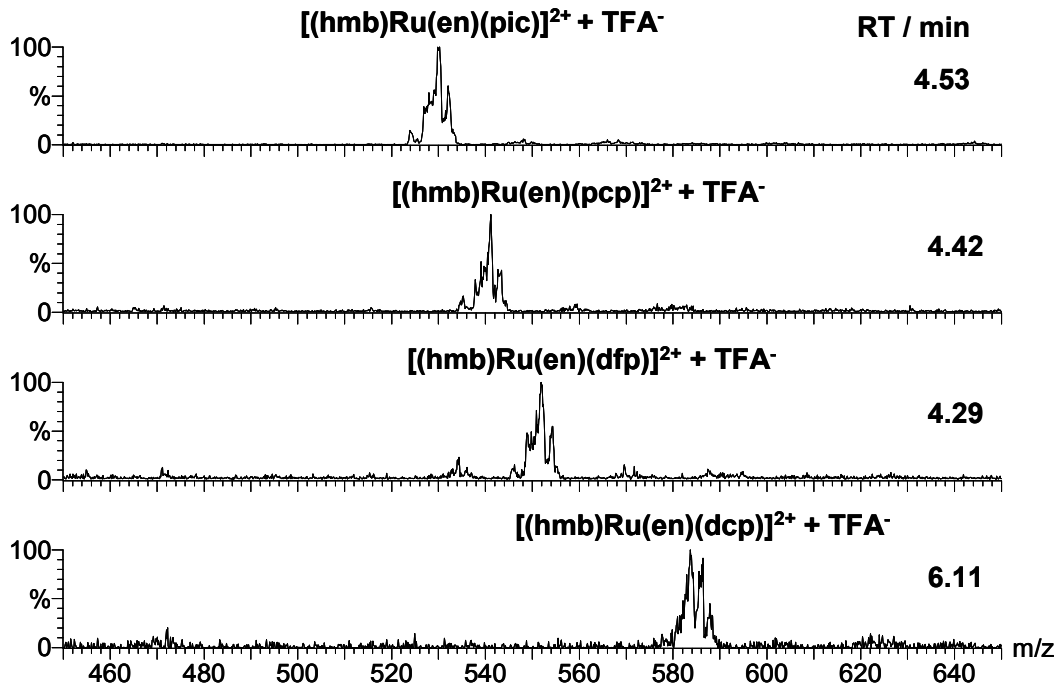

Supplement: pnas_0505798102_9.pdf [file pnas_0505798102_9.pdf]
